# Supplementary material for: NCC-BCBM, a Nomogram Prognostic Model in Breast Cancer Patients with Bone Metastases
Source: Research Square preprint supplement (doi:10.21203/rs.3.rs-384643/v1), 2021-04-12
Supplement: Supplementary file 1 [file e58a4ebc613292b51f93e47f.xlsx]

## Sheet: Sheet1
Table S1. Univariate Analysis of the Training Cohort
Variable	HR	95%CI	pvalue
Age (years)
<40	1	[Reference]
40-49	1.1	0.96-1.25	0.168
50-59	1.39	1.23-1.57	P<0.001
60-69	1.55	1.37-1.74	P<0.001
70-79	1.83	1.62-2.08	P<0.001
>=80	2.75	2.42-3.13	P<0.001
Race
White	1	[Reference]
Black	1.3	1.21-1.39	P<0.001
Hispanic	0.91	0.84-0.99	0.026
Asian/Pacific Islander	0.89	0.8-0.99	0.037
Other	0.69	0.5-0.96	0.027
Laterality
Left	1	[Reference]
Right	0.96	0.91-1.01	0.084
Bilateral	1.32	1.18-1.47	P<0.001
Unknown	1	0.68-1.46	0.987
Surgery
Surgery not performed	1	[Reference]
Surgery performed	0.52	0.49-0.55	P<0.001
Unknown	0.6	0.48-0.75	P<0.001
Chemotherapy
No/Unknown	1	[Reference]
Yes	0.68	0.65-0.72	P<0.001
AJCC T
T1	1	[Reference]
T2	1.04	0.95-1.14	0.412
T3	1.17	1.06-1.3	0.003
T4	1.53	1.39-1.67	P<0.001
TX	1.75	1.59-1.93	P<0.001
T0	1.33	1.11-1.6	0.002
AJCC N
N0	1	[Reference]
N1	1	0.94-1.07	0.982
N2	0.9	0.82-0.99	0.033
N3	0.98	0.9-1.07	0.648
NX	1.45	1.34-1.57	P<0.001
Grade
Grade I	1	[Reference]
Grade II	1.18	1.06-1.32	0.003
Grade III	1.58	1.41-1.77	P<0.001
Grade IV	2.42	1.79-3.28	P<0.001
Unknown	1.81	1.62-2.03	P<0.001
Subtype
HR+/HER2-	1	[Reference]
HR+/HER2+	0.81	0.75-0.88	P<0.001
HR-/HER2+	1.04	0.92-1.17	0.547
HR-/HER2-	2.51	2.3-2.73	P<0.001
Unknown	1.77	1.66-1.89	P<0.001
Extra metastatic sites
No	1	[Reference]
One	1.58	1.5-1.67	P<0.001
Two	2.34	2.16-2.53	P<0.001
Three	3.06	2.56-3.65	P<0.001
Unknown	1.6	1.34-1.91	P<0.001
